# Supplementary material for: Extensive translation of circular RNAs driven by N6-methyladenosine
Source: PubMed Central journal article supplement (PMC5520850; doi:10.1038/cr.2017.31), 2017-03-10
Supplement: cr201731x8.pdf [file cr201731x8.pdf]

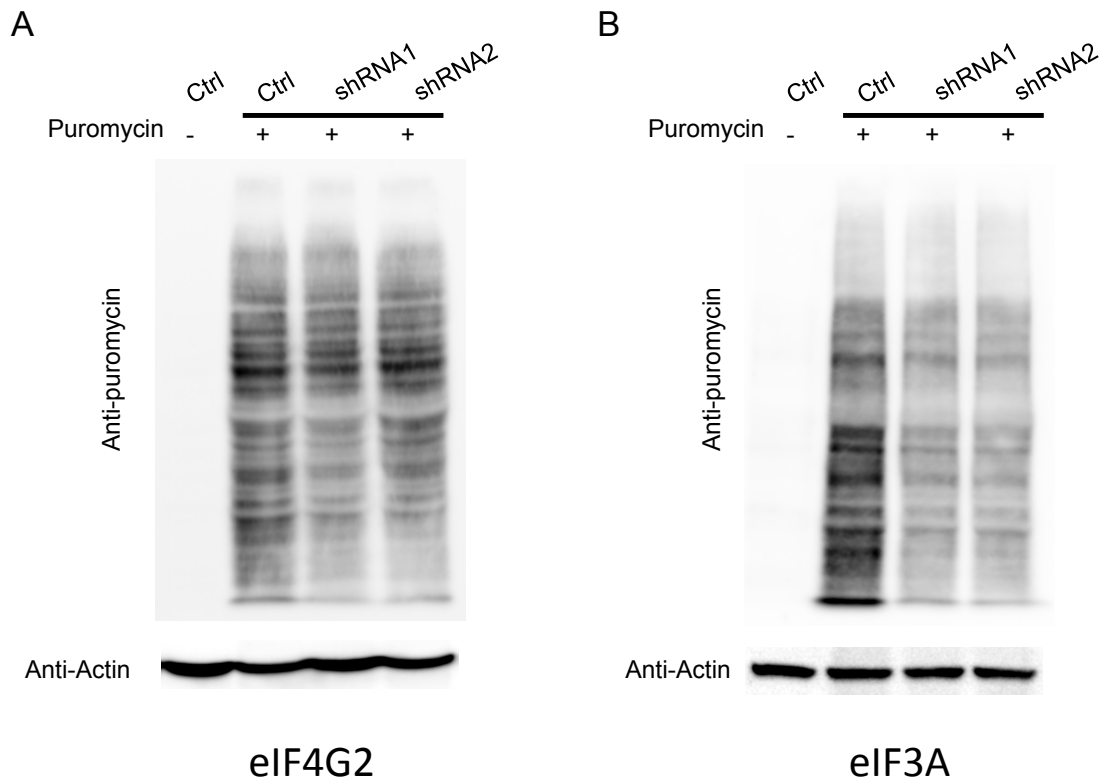

**Figure S4. eIF4G2 and eIF3A knockdown affects global protein synthesis rate**

(A) eIF4G2 knockdown slightly decreased global protein synthesis rate. Cells were treated with 1 $\mu$ g/ml puromycin for 30 min. Total protein were resolved with SDS-PAGE gels and transferred from the gel to PVDF membrane. Puromycin labeled nascent proteins were probed by anti-puromycin antibody.

(B) eIF3A knockdown significantly decreased global protein synthesis rate. Experimental procedure is same as panel a.
