# Supplementary material for: Extensive translation of circular RNAs driven by N6-methyladenosine
Source: PubMed Central journal article supplement (PMC5520850; doi:10.1038/cr.2017.31), 2017-03-10
Supplement: cr201731x10.pdf [file cr201731x10.pdf]

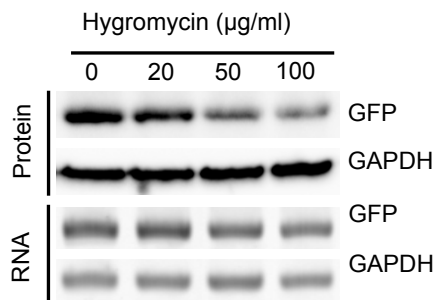

**Figure S6. m<sup>6</sup>A driven circRNA translation is more sensitive to treatment of hygromycin B.** 293 cells were transfected with circRNA reporters containing RSV sequence. The media was changed to fresh media with 0, 20, 50, 100μg/ml hygromycin after 6 hours. After 48hrs, the cells were collected, and RNA and protein expression were analyzed by RT-PCR and western blots.
