# Supplementary material for: Extensive translation of circular RNAs driven by N6-methyladenosine
Source: PubMed Central journal article supplement (PMC5520850; doi:10.1038/cr.2017.31), 2017-03-10
Supplement: cr201731x11.pdf [file cr201731x11.pdf]

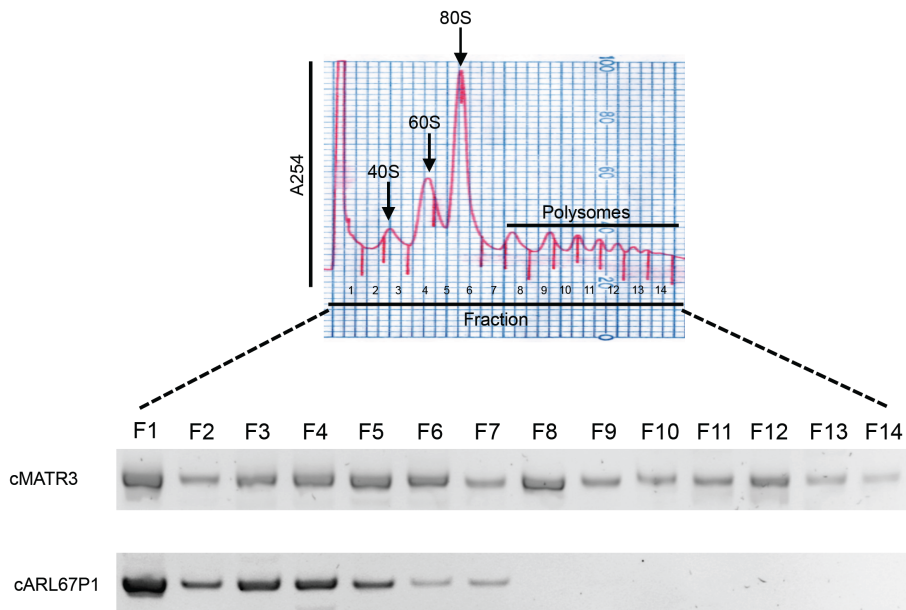

**Figure S7. Entire expression profile across the polysome gradient.** HeLa cells were treated with 200  $\mu$ M cycloheximide, lysed and separated by sucrose gradient centrifugation. The RNAs from different fractions (F1-F14) were purified and used as template for RT-PCR reactions. PCR product was separated by 6% PAGE gel and stained by SYBR Green I.
